# Supplementary material for: Nutrients Supplementation through Organic Manures Influence the Growth of Weeds and Maize Productivity
Source: PubMed Central journal article supplement (PMC7663199; doi:10.3390/molecules25214924), 2020-10-24
Supplement: molecules-25-04924-s001.pdf [file molecules-25-04924-s001.pdf]

*Supplementary Materials*

## **Nutrients Supplementation through Organic Manures Influence the Growth of Weeds and Maize Productivity**

**Supplementary Table S1.** Nutrient content (%) in different organic manures.

| Year of experiment | Organic manures         | Nitrogen (N) | Phosphorus (P <sub>2</sub> O <sub>5</sub> ) | Potassium (K <sub>2</sub> O) |
|--------------------|-------------------------|--------------|---------------------------------------------|------------------------------|
| Year 1             | Vermicompost            | 1.56         | 0.51                                        | 1.07                         |
|                    | Farmyard manure         | 0.65         | 0.26                                        | 0.41                         |
|                    | Brassicaceous seed meal | 4.82         | 1.76                                        | 1.22                         |
|                    | Neem cake               | 5.23         | 1.09                                        | 1.44                         |
| Year 2             | Vermicompost            | 1.54         | 0.52                                        | 0.99                         |
|                    | Farmyard manure         | 0.59         | 0.25                                        | 0.43                         |
|                    | Brassicaceous seed meal | 4.80         | 1.77                                        | 1.21                         |
|                    | Neem cake               | 5.18         | 1.07                                        | 1.43                         |

**Supplementary Table S2.** Physico-chemical properties and nutrient status of post-harvest soil (after first year of maize crop).

| Treatments combination        |           | pH   | EC<br>(dS/m) | Organic<br>carbon<br>(g/kg) | Nutrient status (kg/ha) |                               |                  |
|-------------------------------|-----------|------|--------------|-----------------------------|-------------------------|-------------------------------|------------------|
|                               |           |      |              |                             | N                       | P <sub>2</sub> O <sub>5</sub> | K <sub>2</sub> O |
| Weedy check                   | RDF       | 7.15 | 0.223        | 4.25                        | 189                     | 36.7                          | 145              |
|                               | RDF + FYM | 7.17 | 0.247        | 5.52                        | 206                     | 35.8                          | 141              |
|                               | RDF + VC  | 7.22 | 0.210        | 4.20                        | 188                     | 36.2                          | 159              |
|                               | RDF + BSM | 7.44 | 0.150        | 3.48                        | 169                     | 40.1                          | 153              |
|                               | RDF + NC  | 6.98 | 0.297        | 4.16                        | 186                     | 41.8                          | 137              |
| Chemical weed<br>management   | RDF       | 7.64 | 0.273        | 3.64                        | 191                     | 41.8                          | 142              |
|                               | RDF + FYM | 7.02 | 0.227        | 4.88                        | 195                     | 39.8                          | 158              |
|                               | RDF + VC  | 7.04 | 0.347        | 4.25                        | 189                     | 41.8                          | 157              |
|                               | RDF + BSM | 6.99 | 0.247        | 4.40                        | 193                     | 36.7                          | 152              |
|                               | RDF + NC  | 7.40 | 0.267        | 4.59                        | 198                     | 38.2                          | 149              |
| Integrated weed<br>management | RDF       | 7.26 | 0.287        | 4.25                        | 189                     | 42.1                          | 154              |
|                               | RDF + FYM | 6.98 | 0.210        | 4.35                        | 192                     | 36.1                          | 152              |
|                               | RDF + VC  | 7.18 | 0.223        | 4.35                        | 192                     | 42.4                          | 151              |
|                               | RDF + BSM | 7.03 | 0.297        | 4.83                        | 204                     | 34.3                          | 145              |
|                               | RDF + NC  | 7.20 | 0.213        | 3.96                        | 181                     | 45.8                          | 152              |
| SEm ±                         |           | 0.16 | 0.038        | 0.39                        | 9                       | 2.9                           | 5                |
| CD ( $p \leq 0.05$ )          |           | NS   | NS           | NS                          | NS                      | NS                            | NS               |
